# Supplementary material for: Boosting bifunctional electrocatalytic activity in S and N co-doped carbon nanosheets for high-efficiency Zn–air batteries
Source: Royal Society of Chemistry journal article supplement (doi:10.1039/c9ta12762c), 2020-01-01
Supplement: c9ta12762c1.pdf [file c9ta12762c1.pdf]

Electronic Supplementary Information (ESI)

## Boosting bifunctional electrocatalytic activity in S and N co-doped carbon nanosheets for high-efficiency Zn-air batteries

*Yibo Guo<sup>1</sup>, Sai Yao<sup>1</sup>, Longxue Gao, An Chen, Menggai Jiao, Huijuan Cui\*, Zhen Zhou\**

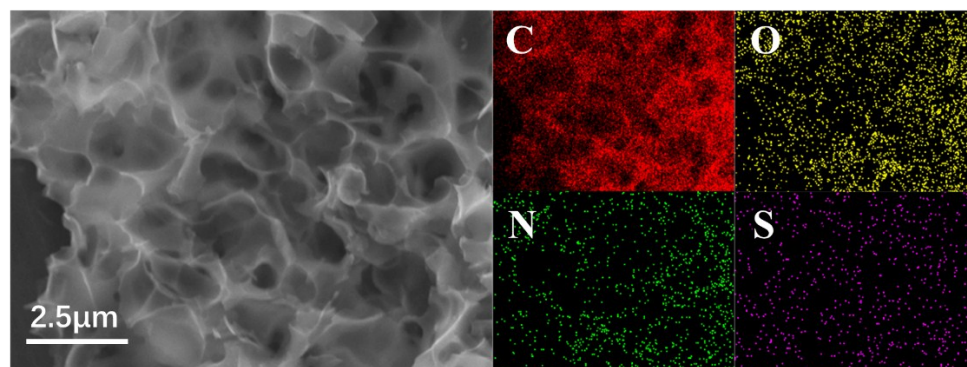

**Fig.S1.** SEM images and energy dispersive X-ray spectroscopy (EDS) elemental mapping of C, O, N and S of SNC.

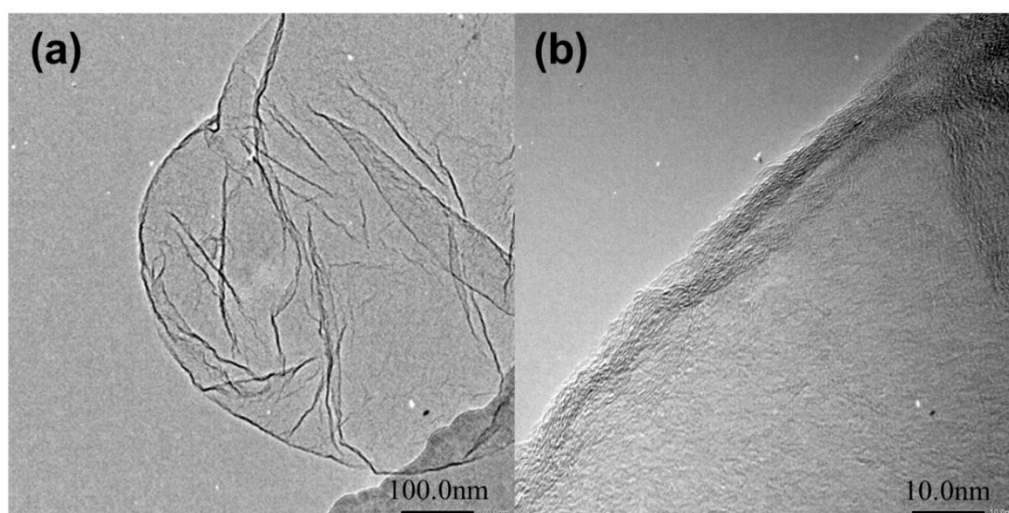

**Fig. S2.** (a) TEM images and (b) HRTEM image of SNC.

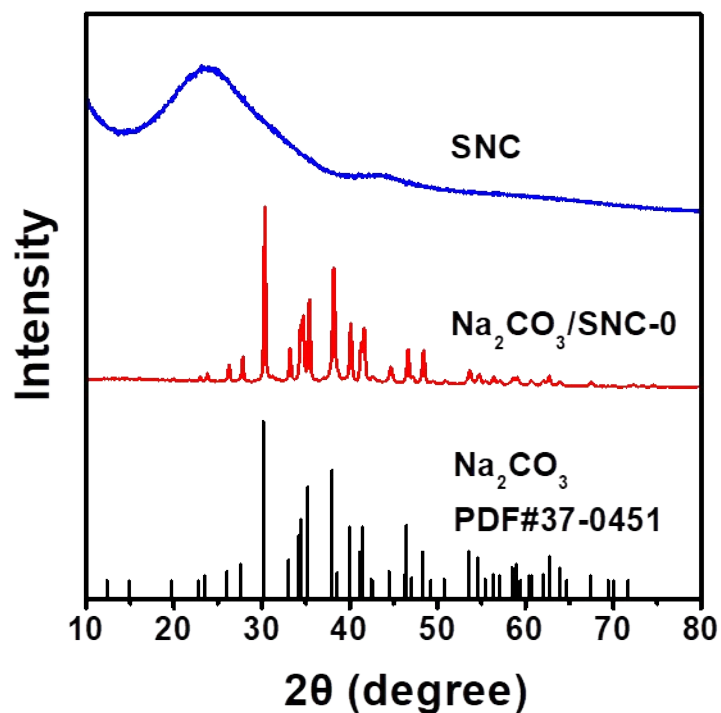

**Fig. S3.** XRD patterns of SNC (blue line) and the sample after fast pyrolysis (red line). Compared with the standard cards of XRD, the sample after fast pyrolysis was  $\text{Na}_2\text{CO}_3/\text{SNC-0}$ . After washing with water, the  $\text{Na}_2\text{CO}_3$  particles were removed, leaving the carbon product which was defined as SNC-0.

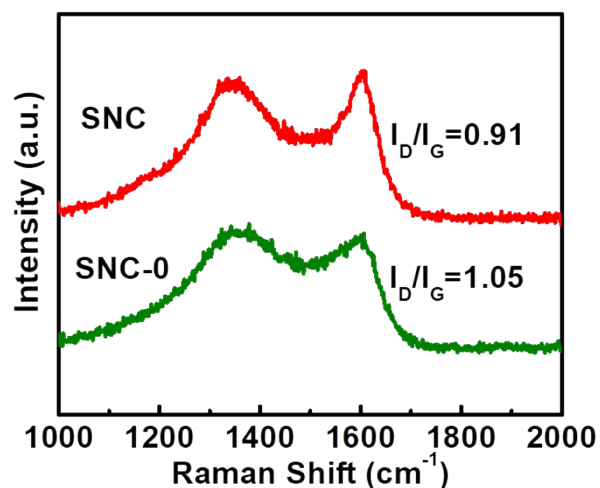

**Fig. S4.** Raman Spectra of SNC and SNC-0 (sample without second pyrolysis).

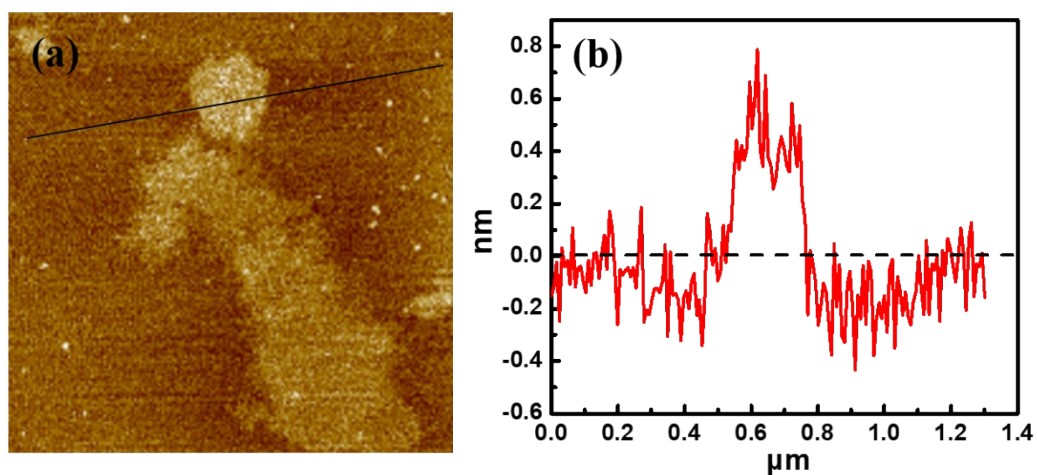

**Fig. S5.** AFM image of SNC. The thickness of the SNC sheet is about 1.0 nm.

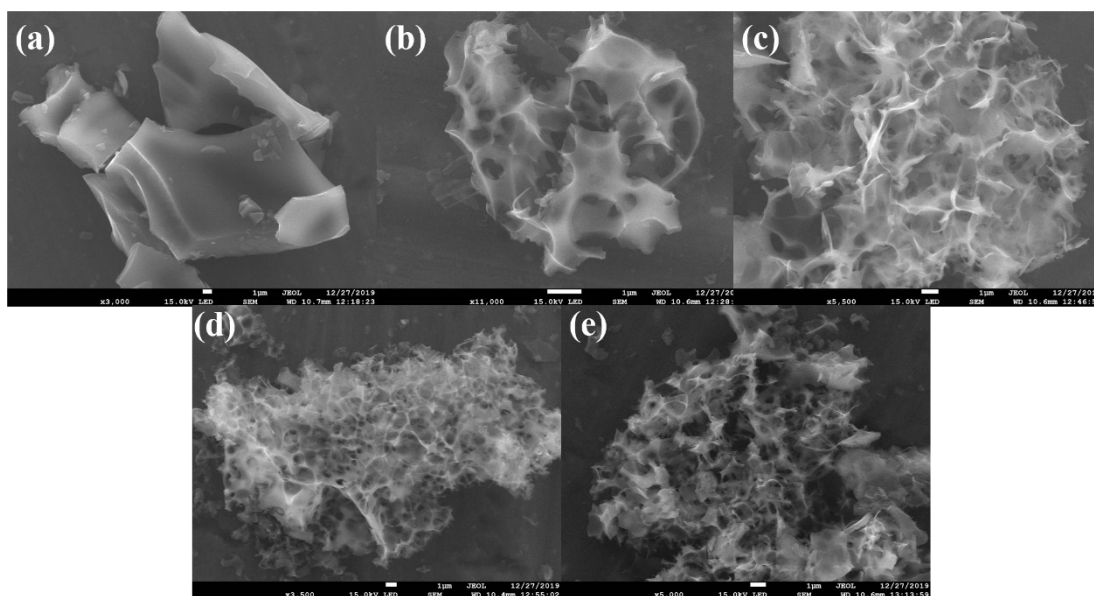

**Fig. S6.** SEM images of samples synthesized with different proportions of L-cysteine and  $\text{Na}_2\text{CO}_3$ . a), 1:0; b) 1:0.5; c) 1:3; d) 1:5; e) 1:7.

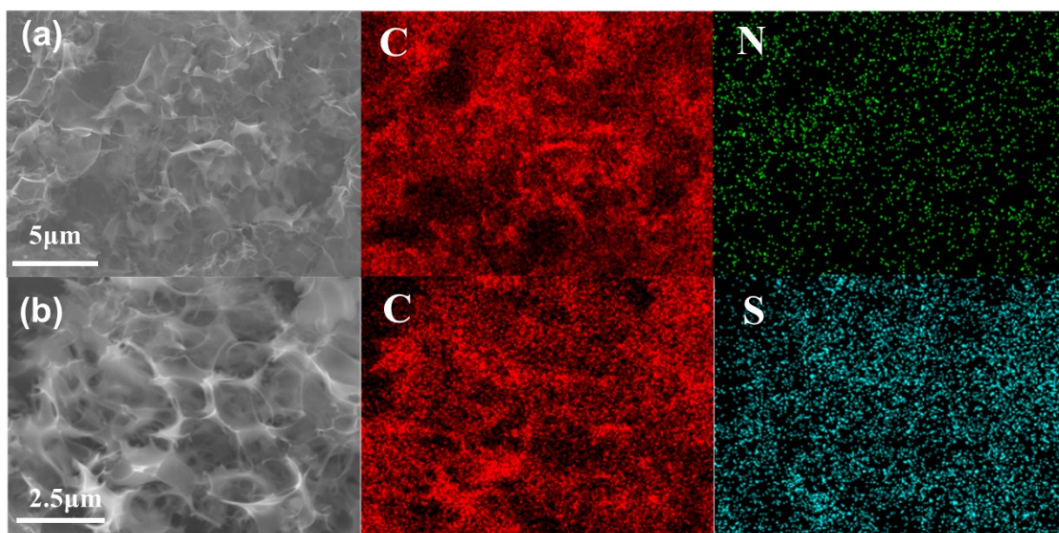

**Fig. S7.** (a) SEM image of NC and EDS elemental mapping images of C and N of NC. (b) SEM image of SC and EDS elemental mapping images of C, and S of SC.

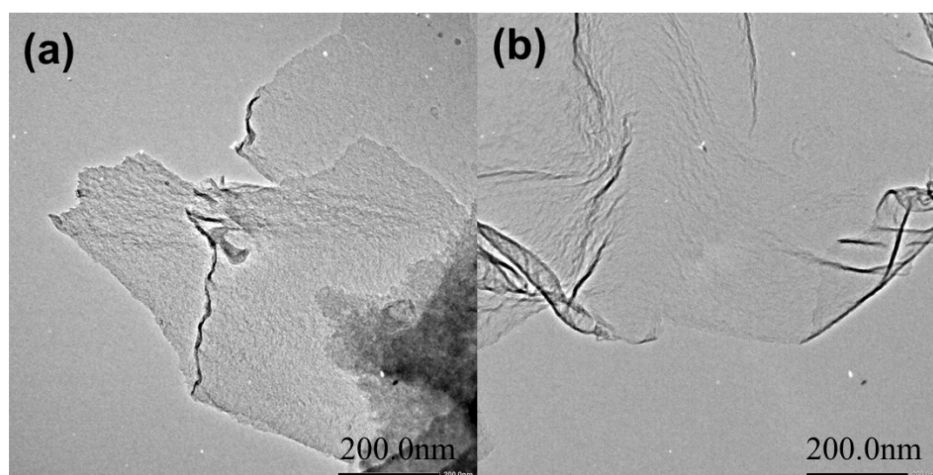

**Fig. S8.** (a) TEM images of NC. (b) TEM images of SC.

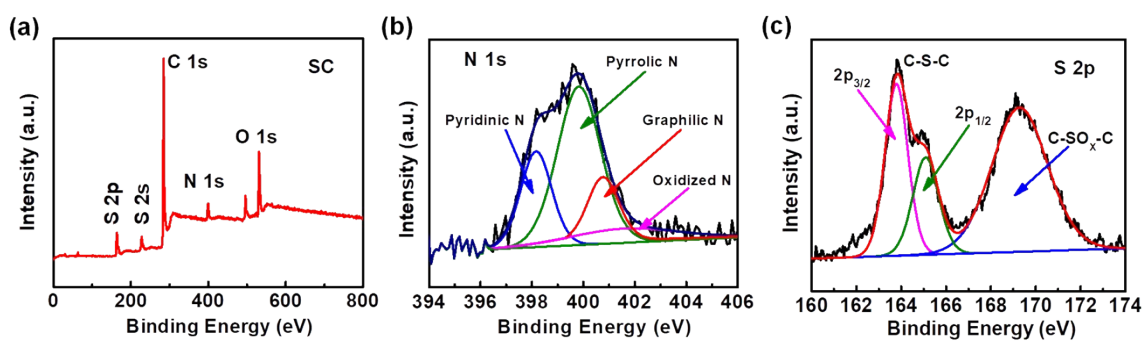

**Fig. S9.** (a) XPS, (b) N1s fitting results and (c) S2p fitting results of SNC-0 (sample without second pyrolysis).

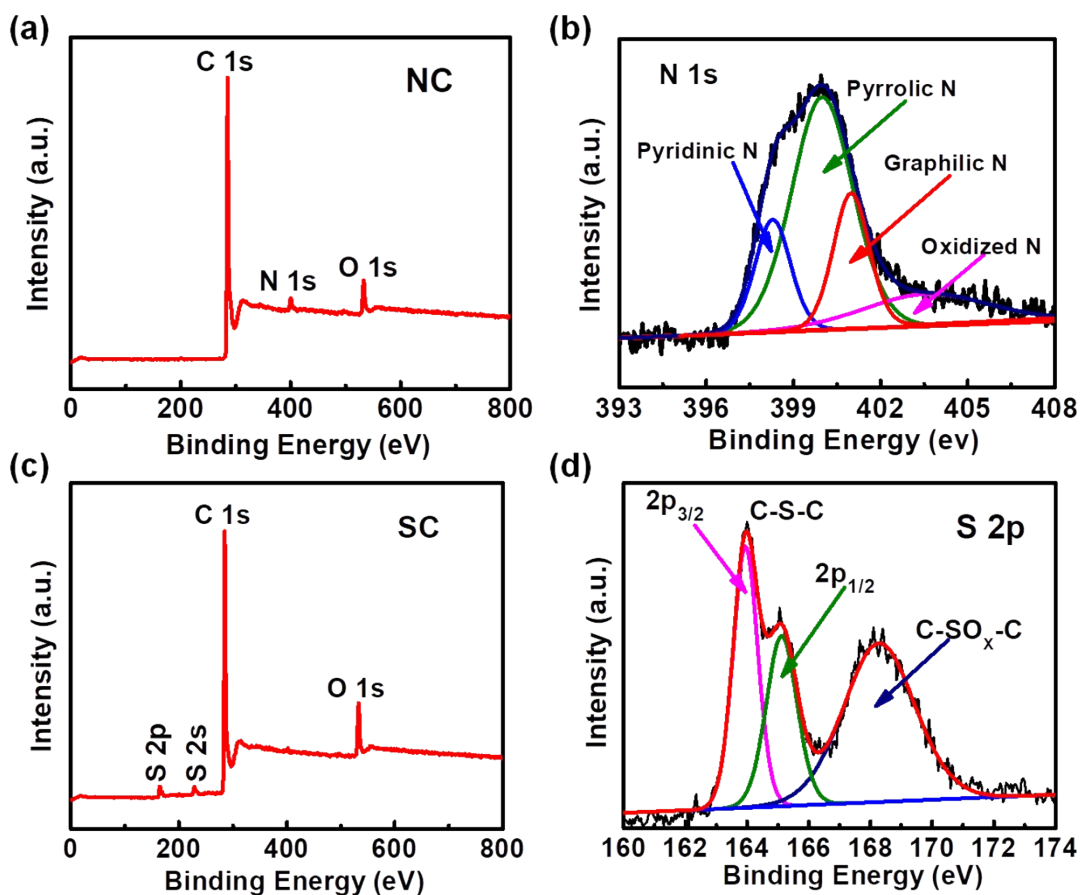

**Fig. S10.** (a) XPS and (b) N1s fitting results of NC; (c) XPS and (d) S2p fitting results of SC.

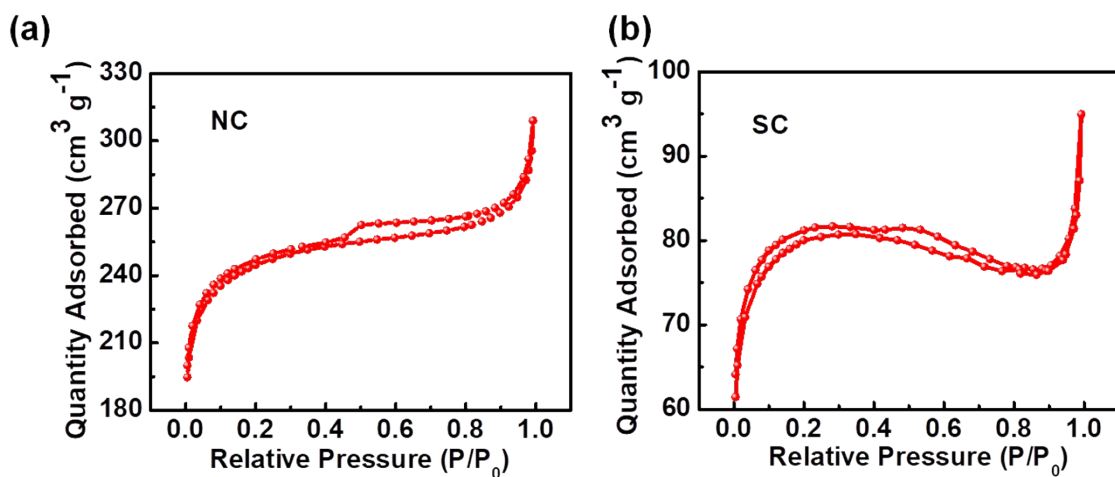

**Fig. S11.** N<sub>2</sub> adsorption-desorption isotherm curves of NC (a) and SC (b).

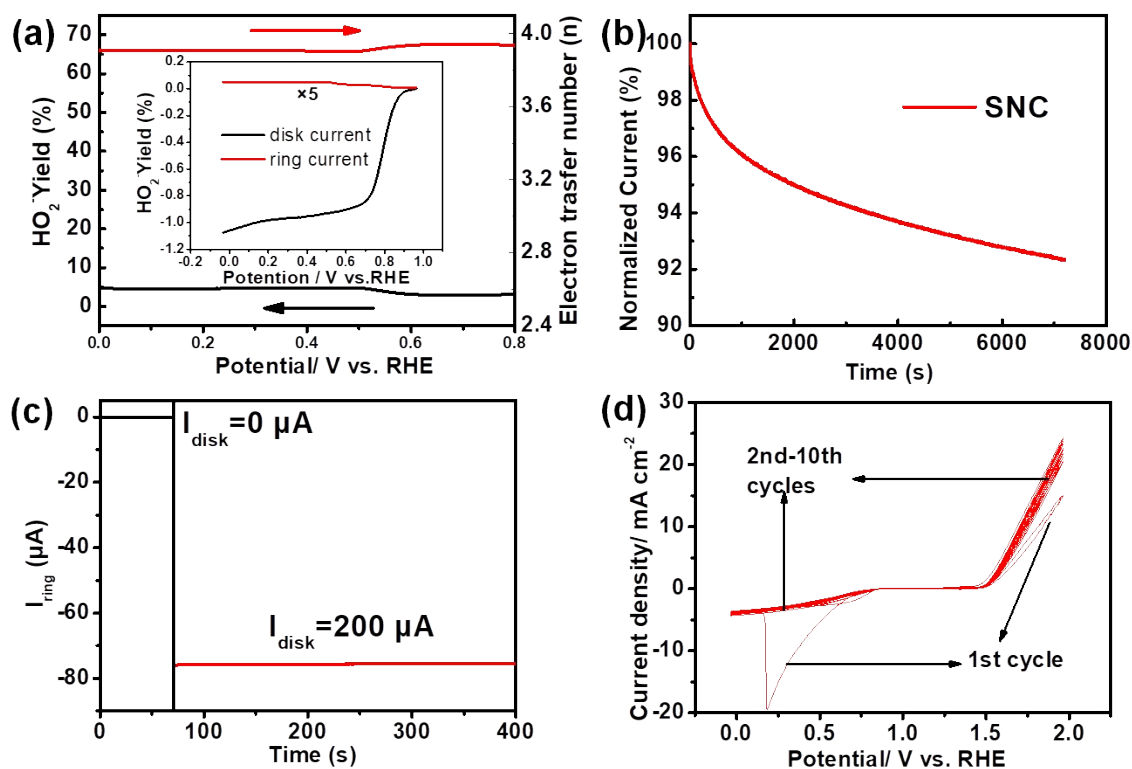

**Fig. S12.** (a) Electron transfer number ( $n$ ) and  $\text{HO}_2^-$  yield derived from the RRDE tests for ORR, and the inset exhibits RRDE voltammograms of the SNC catalyst at 1600 rpm. The ring current is amplified by 5 for better resolution. (b) Current-time chronoamperometric response for the ORR at the half-wave potential of the SNC catalyst. (c) Ring current of SNC for OER on a RRDE at 1600 rpm with a ring potential of 0.45 V in 0.1 M KOH solution. (d) Continuous voltammetry of SNC scanning from OER to ORR with a scan rate of  $5 \text{ mV s}^{-1}$ .

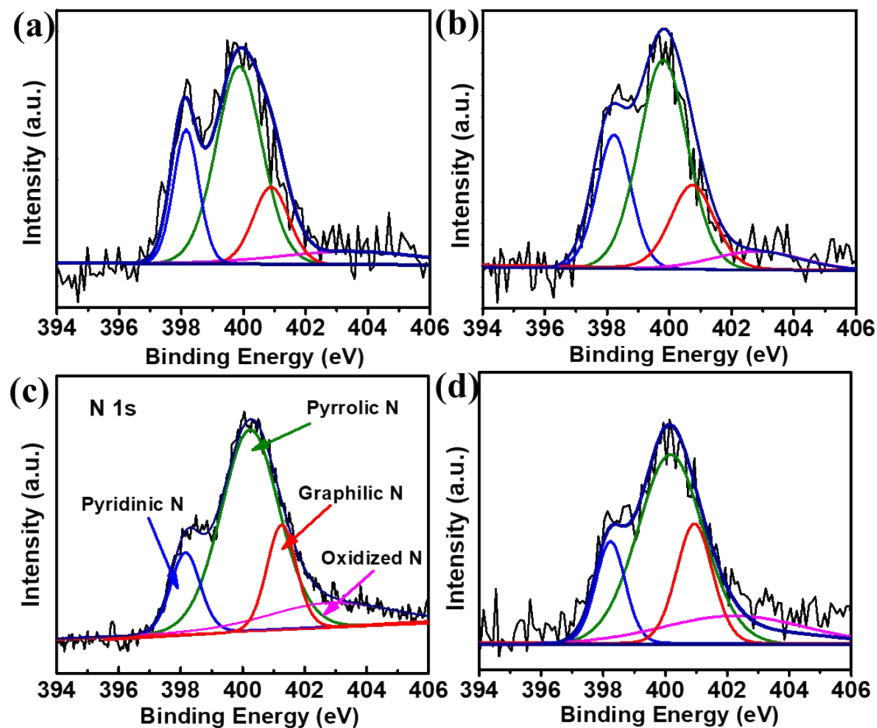

**Fig. S13.** N1s fitting results of SNC synthesized with different fast pyrolysis temperatures. (a) 800 °C (b) 900 °C (c) 1000 °C (d) 1100 °C.

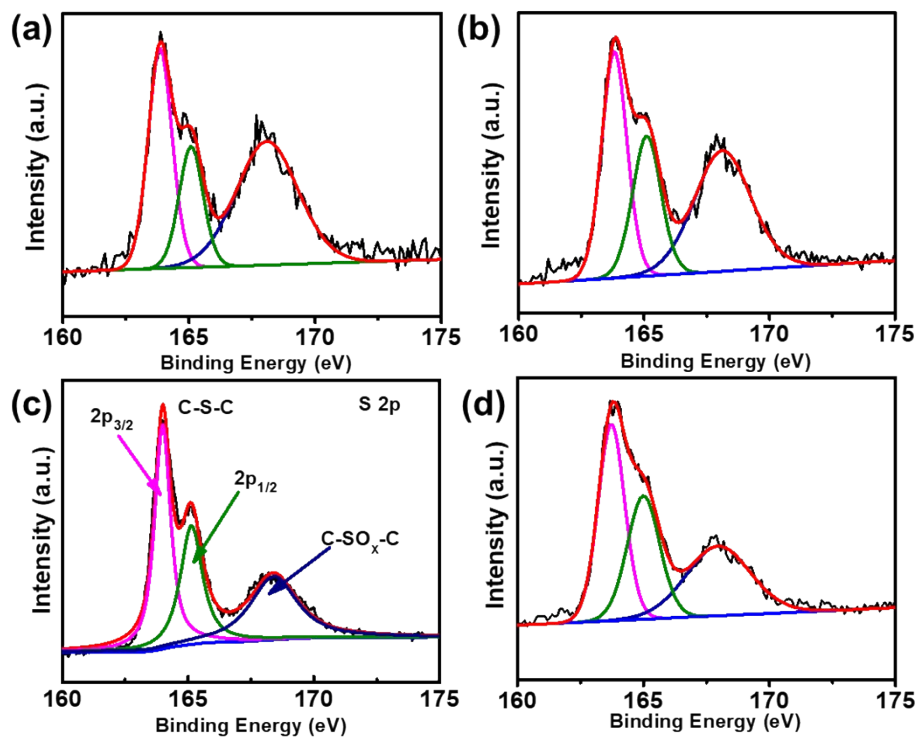

**Fig. S14.** S2p fitting results of SNC synthesized with different fast pyrolysis temperatures. (a) 800 °C (b) 900 °C (c) 1000 °C (d) 1100 °C.

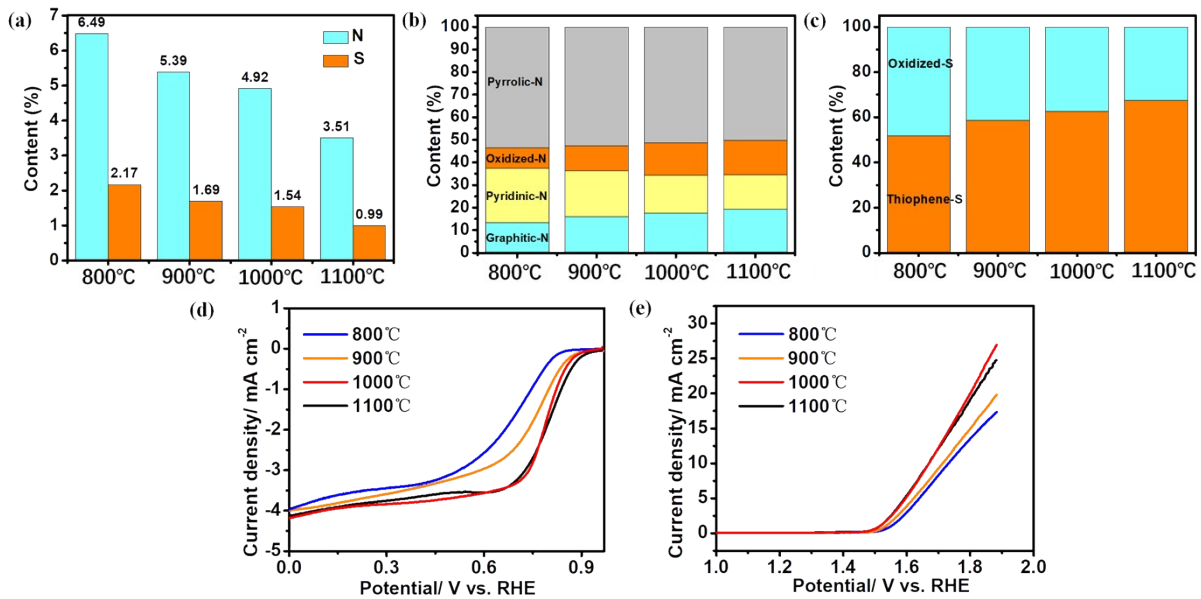

**Fig. S15.** (a) The total contents of N and S. (b, c) The relative contents of different configurations of N and S. (d, e) ORR and OER LSV curves of SNC synthesized with different fast pyrolysis temperatures.

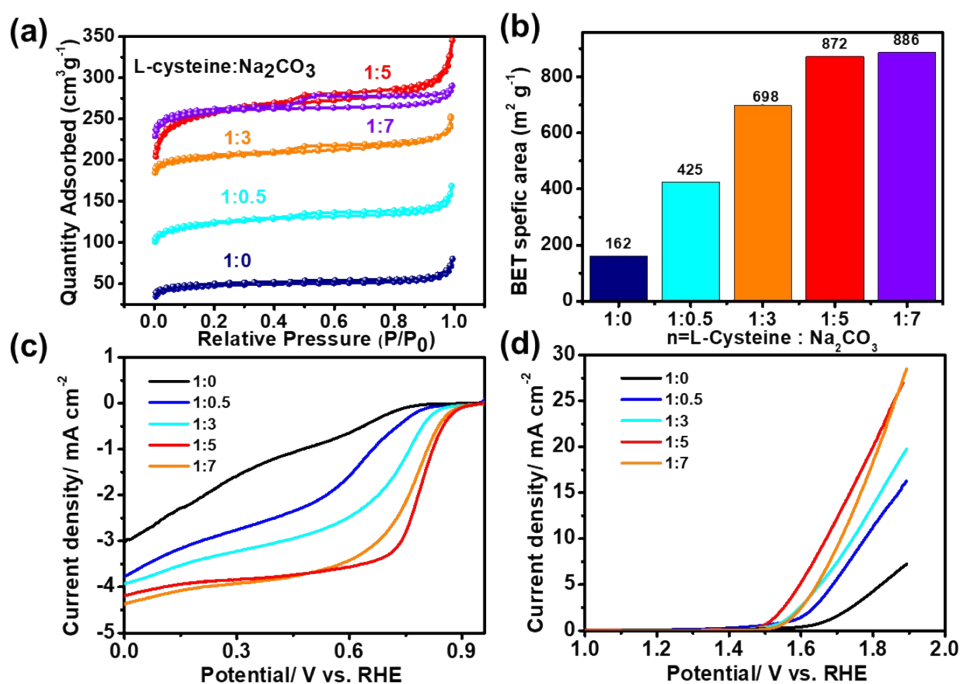

**Fig. S16.** (a) N<sub>2</sub> adsorption-desorption isotherm curves, (b) BET specific surface area, (c) ORR and (d) OER LSV curves of SNC synthesized with different proportions of L-cysteine and Na<sub>2</sub>CO<sub>3</sub>.



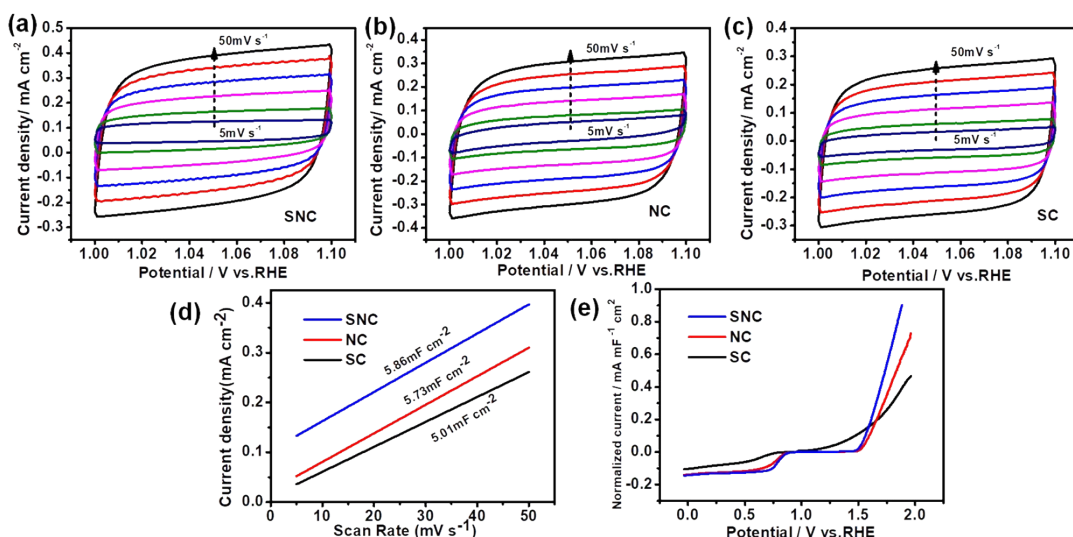

**Fig. S17.** CV curves at various scan rates within a potential window from 1.0 to 1.1 V vs. RHE without Faradaic processes: (a) SNC, (b) NC, and (c) SC, (d) Charging current densities with different scan rates. The slopes of the straight lines are equivalent to the double-layer capacitance ( $C_{dl}$ ). (e) LSV curves of different catalysts for ORR and OER, the current is normalized to electrochemical active surface area.

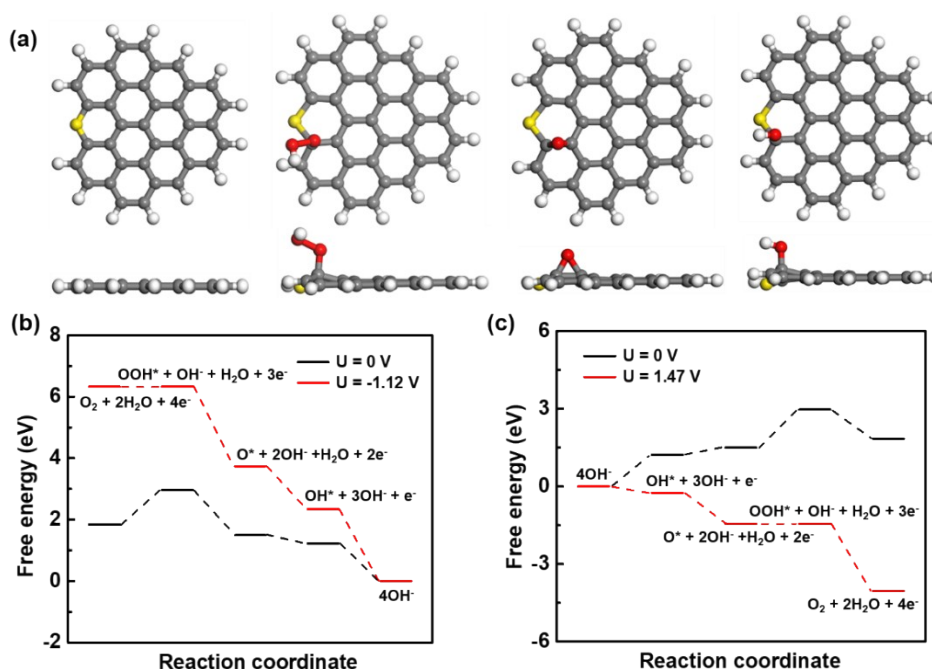

**Fig. S18.** a) Initial structure and structures after adsorbing  $\text{OOH}^*$ ,  $\text{O}^*$ , and  $\text{OH}^*$  intermediates on sulfur-doped graphene. The C, H, O and S atoms are shown in gray, white, red and yellow, respectively; b, c) Free energy diagrams for ORR/OER on the sulfur-doped graphene in alkaline media.

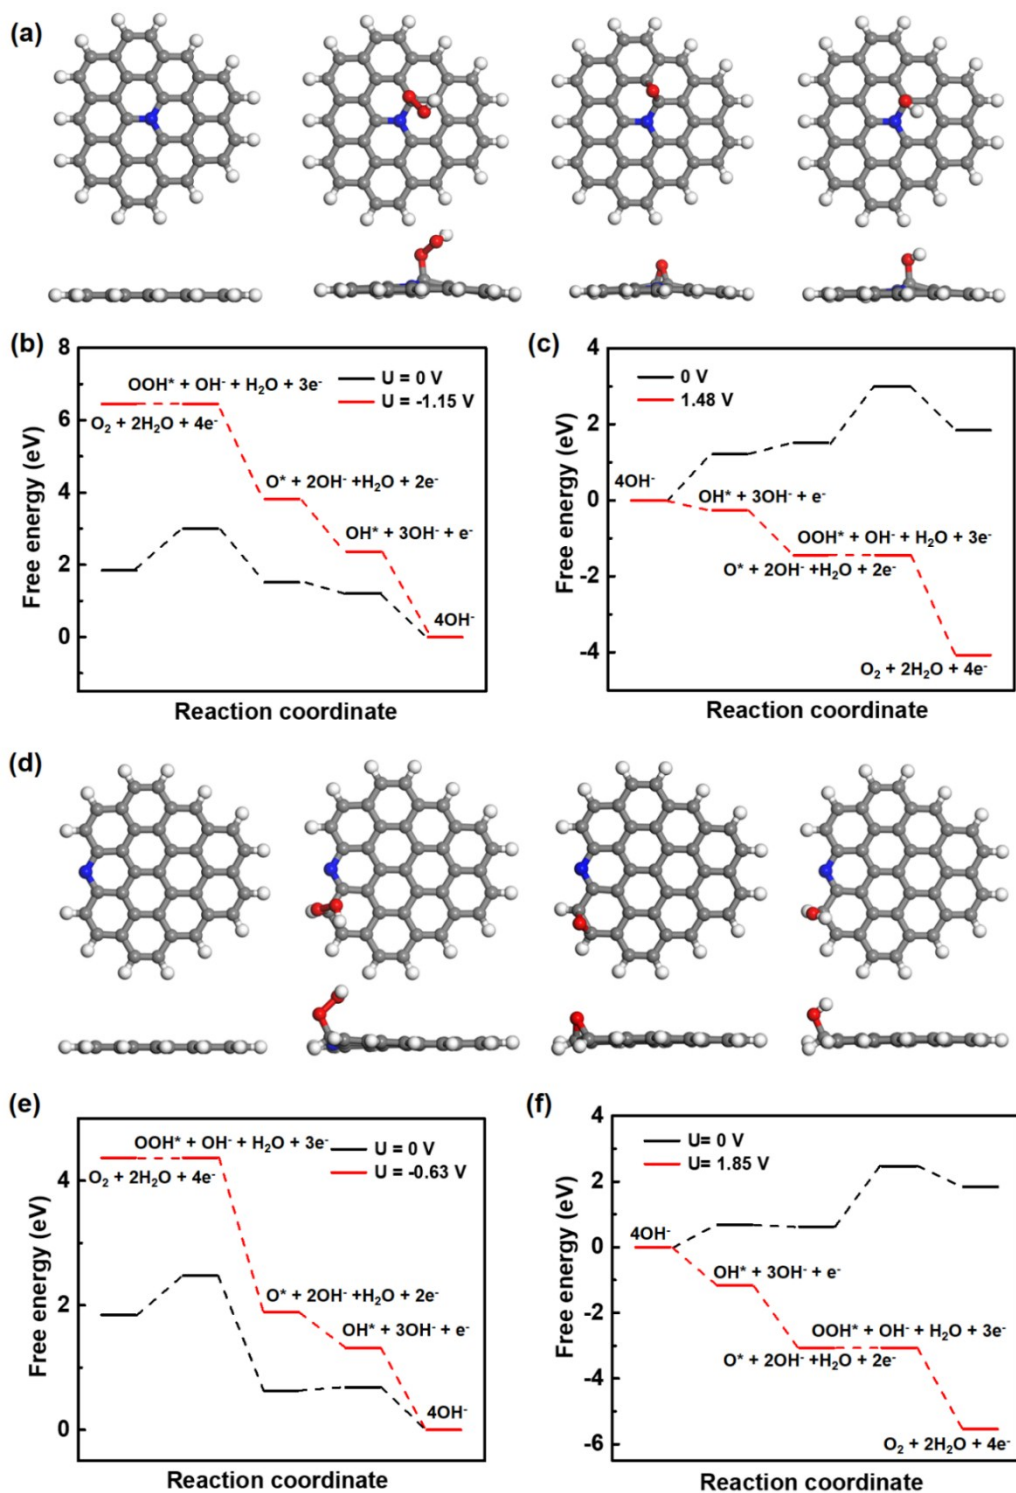

**Fig. S19.** a, d) Initial structure and structures after adsorbing  $\text{OOH}^*$ ,  $\text{O}^*$ , and  $\text{OH}^*$  intermediates on grN-G/pyN-G. The C, N, H and O atoms are shown in gray, blue, white and red, respectively; b, e) Free energy diagrams for ORR on the grN-G/pyN-G in alkaline media; c, f) Free energy diagrams for OER on the grN-G/pyN-G in alkaline media.

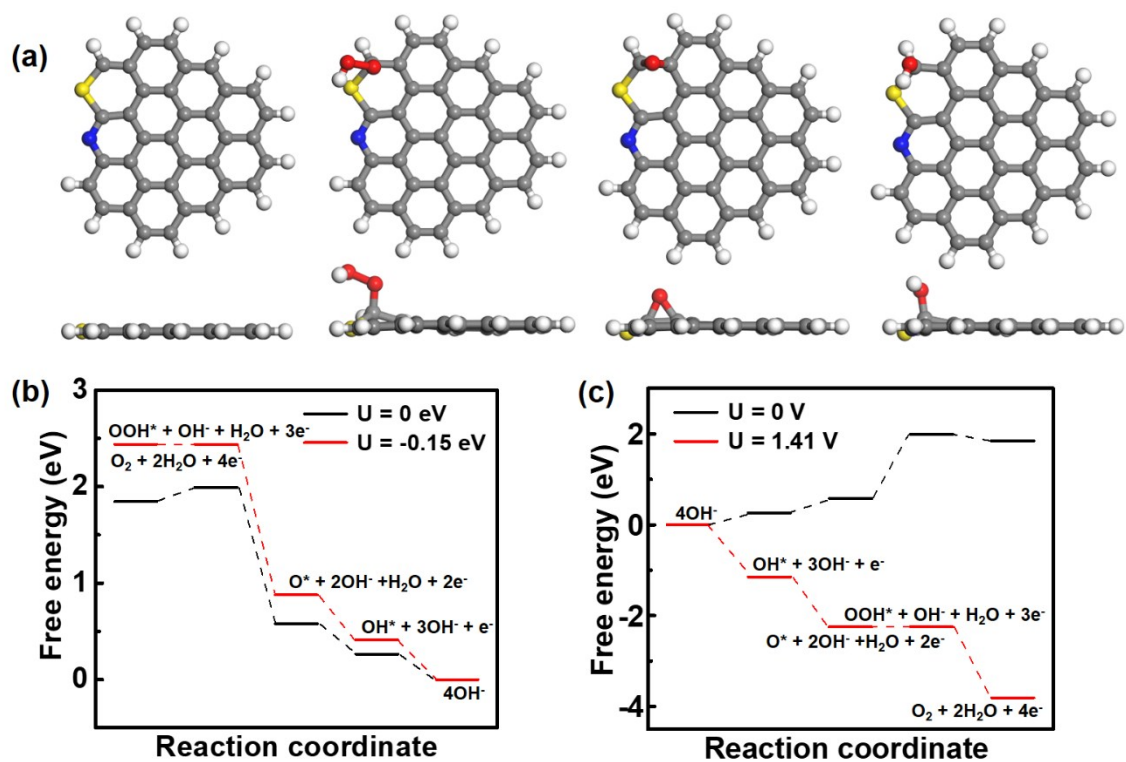

**Fig. S20.** a) Initial structure and structures after adsorbing  $\text{OOH}^*$ ,  $\text{O}^*$ , and  $\text{OH}^*$  intermediates on pyN-S-G. The C, N, H, O and S atoms are shown in gray, blue, white, red and yellow, respectively; b, c) Free energy diagrams for ORR/OER on the pyN-S-G in alkaline media.

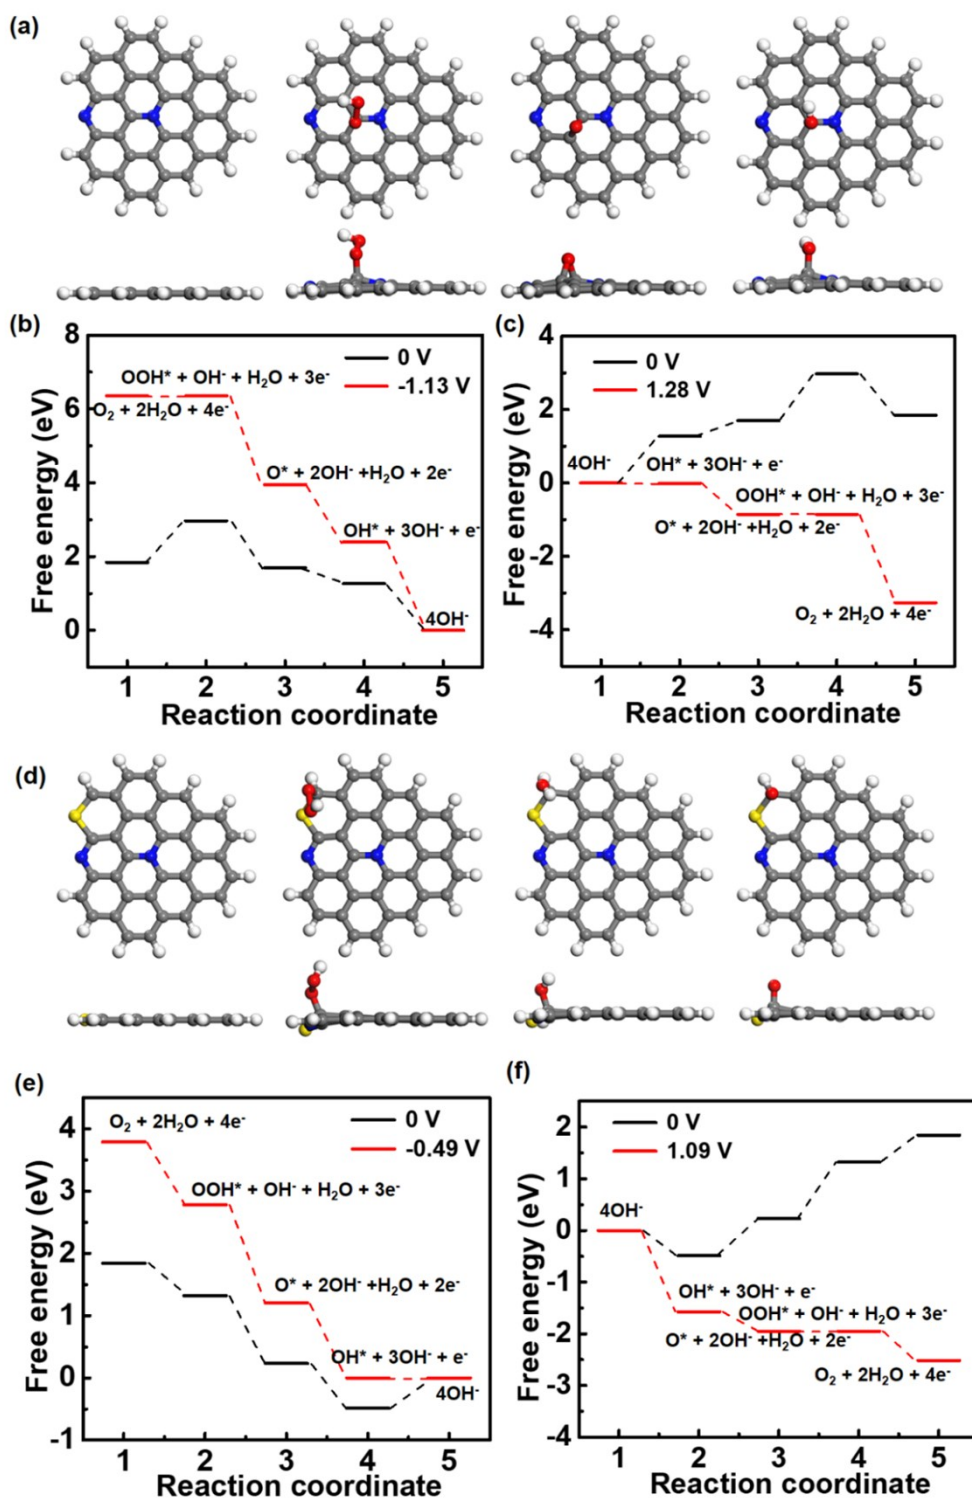

**Fig. S21.** a, d) Initial structure and structures after adsorbing OOH\*, O\*, and OH\* intermediates on grN-pyN-G/ grN-pyN-S-G. The C, N, H, O and S atoms are shown in gray, blue, white, red and yellow, respectively; b, e) Free energy diagrams for ORR on the grN-pyN-G/ grN-pyN-S-G in alkaline media; c, f) Free energy diagrams for OER on the grN-pyN-G/ grN-pyN-S-G in alkaline media.

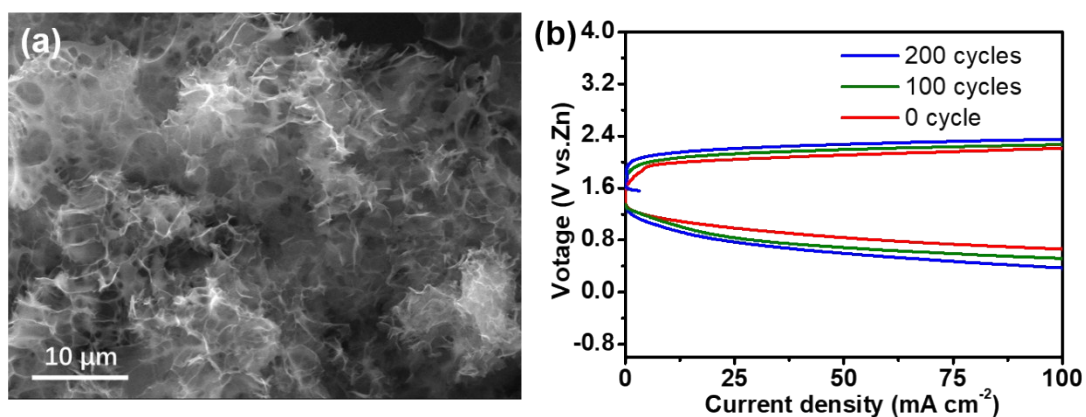

**Fig. S22.** (a) SEM images of SNC obtained after 200 cycles (1 h per cycle). (b) Charge and discharge polarization curves of batteries after different cycles.

**Table S1** Element contents (at. %) and N 1s/S 2p fitting results of SC, NC and SNC.

| Catalyst | C     | O     | N    | S    | N 1s      |          |           |          | S 2p      |          |
|----------|-------|-------|------|------|-----------|----------|-----------|----------|-----------|----------|
|          |       |       |      |      | pyridinic | pyrrolic | graphitic | oxidized | thiophene | oxidized |
| SC       | 88.72 | 9.65  | -    | 1.63 | -         | -        | -         | -        | 50.84     | 49.16    |
| NC       | 86.13 | 8.84  | 5.03 | -    | 17.31     | 49.23    | 19.02     | 14.44    | -         | -        |
| SNC      | 84.81 | 8.73  | 4.92 | 1.54 | 16.77     | 51.37    | 17.61     | 14.25    | 62.61     | 37.39    |
| SNC-0    | 78.82 | 10.87 | 6.84 | 3.47 | 19.79     | 55.76    | 12.92     | 11.53    | 44.52     | 55.48    |

**Table S2** The electrocatalytic performance parameters (vs RHE) of SC, NC, SNC and Pt/C.

| Catalyst       | ORR                    |                               |               | OER                                   | Overall        |
|----------------|------------------------|-------------------------------|---------------|---------------------------------------|----------------|
|                | $E_{\text{onset}}$ [V] | $J_L$ [ $\text{mA cm}^{-2}$ ] | $E_{1/2}$ [V] | $E_{j=10}$<br>[ $\text{mA cm}^{-2}$ ] | $\Delta E$ [V] |
| SC             | 0.85                   | -2.66                         | 0.56          | 1.88                                  | 1.32           |
| NC             | 0.90                   | -4.22                         | 0.68          | 1.75                                  | 1.07           |
| SNC            | 0.96                   | -4.25                         | 0.78          | 1.67                                  | 0.89           |
| Pt/C           | 0.97                   | -4.83                         | 0.82          | 1.88                                  | 1.06           |
| $\text{RuO}_2$ | 0.82                   | -3.91                         | 0.62          | 1.65                                  | 1.03           |

**Table S3** Comparisons of electrocatalytic performance (vs RHE) for SNC with other reported bi-functional ORR/OER catalysts in 0.1 M KOH electrolyte.

| Catalyst                                                    | $E_{1/2}$ [V] | $E_{j=10}$ [V] | $\Delta E$ [V] | Reference                                 |
|-------------------------------------------------------------|---------------|----------------|----------------|-------------------------------------------|
| N-doped graphene                                            | 0.78          | 1.69           | 0.91           | Small Methods, 2018, 1800144              |
| B, N co-doped porous carbon                                 | 0.79          | 1.82           | 1.03           | Carbon, 2017, 111, 641-650                |
| N-doped porous carbon fiber                                 | 0.82          | 1.84           | 1.02           | Adv. Mater. 2016, 28, 3000-3006           |
| P-doped C <sub>3</sub> N <sub>4</sub> on carbon fiber paper | 0.67          | 1.63           | 0.96           | Angew. Chem. Int. Ed. 2015, 54, 4646-4650 |
| N,S codoped porous carbon                                   | 0.88          | ---            | ---            | J. Mater. Chem. A, 2019, 7, 11223-11233.  |
| N,S codoped porous carbon                                   | 0.77          | ---            | ---            | Electrochimica Acta 2018, 266, 17-26      |
| N,S codoped porous carbon                                   | 0.83          | ---            | ---            | Small 2018, 14, 1800563                   |
| MnO@Co-N/C                                                  | 0.83          | 1.76           | 0.93           | J. Mater. Chem. A, 2018, 6, 9716–9722     |
| Co <sub>2</sub> P@CoNPG-900                                 | 0.81          | 1.73           | 0.92           | Electrochim. Acta, 2017, 231, 344-353     |
| ZnCoNC-0.1                                                  | 0.84          | 1.75           | 0.91           | Nano Research, 2017, 11, 163-173          |
| SNC                                                         | 0.78          | 1.67           | 0.89           | This Work                                 |

**Table S4** Comparisons of electrocatalytic performance for Zn-air batteries with SNC cathodes with other reported ones.

| Catalyst                                                 | Peak power density<br>[mW cm <sup>-2</sup> ] | Cycling conditions<br>[mA cm <sup>-2</sup> ] | Stability                               | Reference                              |
|----------------------------------------------------------|----------------------------------------------|----------------------------------------------|-----------------------------------------|----------------------------------------|
| NiO-Al-Co/carbon cloth                                   | 36.3                                         | 5                                            | 20 min/cycle for 1000<br>cycles (333 h) | Electrochim. Acta,<br>2018, 290, 21-29 |
| MnO/Co/PGC                                               | 172                                          | 10                                           | 60 min/cycle for 350<br>cycles (350 h)  | Adv. Mater., 2019, 31,<br>1902339      |
| MnCo <sub>2</sub> O <sub>4</sub> @C                      | 40                                           | 10                                           | 20 min/cycle for 210<br>cycles (70 h)   | J. Power Sources,<br>2019, 430, 25-31  |
| Co-Ni-S@NSPC                                             | 100                                          | 10                                           | 20 min/cycle for 180<br>cycles (60 h)   | Carbon, 2019, 146,<br>476-485          |
| B/N co-doped porous<br>carbon                            | 14.6                                         | 20                                           | 10 min/cycle for 66<br>cycles (11 h)    | Adv. Mater., 2015,<br>27, 3789-3796    |
| Fe <sub>0.5</sub> Co <sub>0.5</sub> O <sub>x</sub> /NrGO | 86                                           | 10                                           | 2 h/cycle for 60<br>cycles (120 h)      | Adv. Mater., 2017, 29,<br>1701410      |
| NPMC-1000                                                | 55                                           | 2                                            | 10 min/cycle for 180<br>cycles (30 h)   | Nat. Nanotech.,<br>2015, 10, 444-452   |
| NCNT/Co <sub>x</sub> Mn <sub>1-x</sub> O                 | 81                                           | 7                                            | 10 min/cycle for 72<br>cycles (12 h)    | Nano Energy, 2016,<br>20, 315-325      |
| SNC                                                      | 94.8                                         | 5                                            | 60 min/cycle for 500<br>cycles (500 h)  | This Work                              |
